# Supplementary material
Source: publisher figshare collection journal article supplement (https://acs.figshare.com/ndownloader/files/8486213)
Supplement: Supplementary file 1 [file 8486213]

# Supporting Information

## Two Zeolitic Open-Framework Aluminoborates Directed by Similar

### Zn-complexes

Qi Wei, Jia-Jia Wang, Jie Zhang\* and Guo-Yu Yang<sup>\*,†,‡</sup>

<sup>†</sup> MOE Key Laboratory of Cluster Science, School of Chemistry and Chemical Engineering, Beijing Institute of Technology, Beijing 100081, China. E-mail: zhangjie68@bit.edu.cn, ygy@bit.edu.cn

<sup>‡</sup> Department of Chemistry, Key Laboratory for Preparation and Application of Ordered Structural Materials of Guangdong Province, Shantou University, Shantou, Guangdong 515063, China

**Table S1.** Ranges of Selected bond distances (Å) of compounds **1** and **2**.

**Table S2.** Hydrogen bond lengths (Å) and angles (°) compounds **1** and **2**.

**Figure S1.** Experimental and simulated PXRD patterns of compounds **1** (a) and **2** (b).

**Figure S2.** Views of the linkage of AlO<sub>4</sub> (a) and B<sub>5</sub> groups (b) in **1**. Each AlO<sub>4</sub>/B<sub>5</sub> unit is bridged by four B<sub>5</sub>/AlO<sub>4</sub> groups to 11 others.

**Figure S3.** (a) View of the layer with 8-/14-MR along the [010] direction. (b) View of the layer with 11-MR along the [010] direction. (c) View of the [Zn(ma)(en)<sub>2</sub>]<sup>2+</sup> cations, interacting with the inorganic framework through H-bonds.

**Figure S4.** Views of the linkage of AlO<sub>4</sub> (a) and B<sub>6</sub> groups (b) in **2**. Each AlO<sub>4</sub>/B<sub>6</sub> unit is bridged by four B<sub>6</sub>/AlO<sub>4</sub> groups to 12 others.

**Figure S5.** (a) View of [Zn(ma)(en)<sub>2</sub>]<sup>2+</sup> and the 13-ring opening which is delimited by –AlO<sub>4</sub>–3BO<sub>3</sub>–AlO<sub>4</sub>–4BO<sub>3/4</sub>–AlO<sub>4</sub>–3BO<sub>3/4</sub>– linkages in **2**. (b) View of [Zn(dien)<sub>2</sub>]<sup>2+</sup> and the 13-ring opening which is constructed by –AlO<sub>4</sub>–2BO<sub>3</sub>–AlO<sub>4</sub>–4BO<sub>3/4</sub>–AlO<sub>4</sub>–4BO<sub>3/4</sub>– linkages in **2a**. (c) View of 3-D framework showing 7L and 9R helical channels in **2**. (d) View of the 3-D framework showing two pairs of 7L/7R and 9L/9R helical channels in **2a**.

**Figure S6.** The coordination environments of Zn atoms in compounds **1** (a) and **2** (b).

**Figure S7.** UV-vis-NIR optical diffuse reflectance spectra of compounds **1** (a) and **2** (b).

**Figure S8.** The emission and excitation (inserted graph) spectra of compounds **1** (black) and **2** (red).

**Figure S9.** TG curves of compounds **1** (a) and **2** (b).

**Figure S10.** IR spectra of compounds **1** (a) and **2** (b).

**Table S1.** Ranges of Selected bond distances (Å) of compounds **1** and **2**.

|                   | <b>Compound 1</b>    | <b>Compound 2</b>     |
|-------------------|----------------------|-----------------------|
| Zn-N              | 2.034(3) - 2.225(3)  | 2.067(7) - 2.220(7)   |
| Al-O              | 1.718(2) - 1.740(2)  | 1.723(5) - 1.750(6)   |
| B <sub>Δ</sub> -O | 1.326(4) - 1.401(4)  | 1.299(10) - 1.412(10) |
| B <sub>T</sub> -O | 1.455(4) - 1.485(4)  | 1.431(9) - 1.506(9)   |
| N-C               | 1.437(5) - 1.494(5)  | 1.442(11) - 1.478(12) |
| C-C               | 1.384(10) - 1.505(6) | 1.468(14) - 1.558(14) |

**Table S2.** Hydrogen bond lengths (Å) and angles (°) compounds **1** and **2**.

| <b>Interaction</b> | <b>H...A</b> | <b>D...A</b> | <b>Angle</b> | <b>Symmetry codes</b>   |
|--------------------|--------------|--------------|--------------|-------------------------|
| <b>Compound 1</b>  |              |              |              |                         |
| N1-H1D...O4        | 2.06         | 2.947(3)     | 168.0        | [ x+1/2, -y+1/2, -z+1 ] |
| N1-H1E...O2        | 2.31         | 3.147(3)     | 155.1        | [ -x, -y, -z+1 ]        |
| N1-H1E...O5        | 2.32         | 3.089(3)     | 143.8        | [ -x, -y, -z+1 ]        |
| N2-H2C...O8        | 2.37         | 3.103(4)     | 139.0        | [ x, -y+1/2, z-1/2 ]    |
| N2-H2D...O1        | 2.63         | 3.304(4)     | 131.9        | [ x+1/2, y, -z+1/2 ]    |
| N3-H3C...O6        | 2.40         | 3.195(4)     | 146.6        | [ -x, -y, -z+1 ]        |
| N3-H3C...O5        | 2.45         | 3.286(4)     | 154.5        | [ -x, -y, -z+1 ]        |
| N3-H3D...O4        | 2.50         | 3.374(4)     | 163.9        |                         |
| N3-H3D...O6        | 2.51         | 3.211(4)     | 134.8        |                         |
| N4-H4C...O6        | 2.30         | 3.056(4)     | 141.7        |                         |
| N4-H4C...O4        | 2.43         | 3.268(4)     | 155.7        |                         |
| N4-H4D...O1        | 2.44         | 3.321(4)     | 167.8        | [ x+1/2, -y+1/2, -z+1 ] |
| N5-H5C...O8        | 2.44         | 3.188(4)     | 141.2        | [ x, -y+1/2, z-1/2 ]    |
| N5-H5C...O10       | 2.63         | 3.217(4)     | 123.4        | [ x+1/2, -y+1/2, -z+1 ] |
| <b>Compound 2</b>  |              |              |              |                         |
| O2-H2E...O8        | 2.08         | 2.743(8)     | 145.5        |                         |
| N1-H1C...O10       | 2.56         | 3.439(10)    | 165.4        | [x+1, y, z]             |
| N1-H1D...O3        | 2.42         | 3.316(9)     | 170.4        | [-x+1, y-1/2, -z+1]     |
| N1-H1D...O2        | 2.56         | 3.191(9)     | 127.3        | [-x+1, y-1/2, -z+1]     |
| N2-H2C...O5        | 2.28         | 3.169(11)    | 172.6        | [x, y, z-1]             |
| N2-H2D...O1        | 2.30         | 3.109(8)     | 146.5        | [-x+1, y+1/2, -z+1]     |
| N2-H2D...O7        | 2.66         | 3.411(9)     | 142.2        | [-x+1, y+1/2, -z+1]     |
| N3-H3C...O2        | 2.40         | 3.253(10)    | 157.1        | [-x+1, y-1/2, -z+1]     |
| N3-H3C...O9        | 2.63         | 3.107(9)     | 113.8        | [x+1, y, z]             |
| N3-H3D...O4        | 2.32         | 3.157(8)     | 153.8        |                         |
| N4-H4C...O10       | 2.49         | 3.077(8)     | 123.1        |                         |
| N4-H4C...O11       | 2.57         | 3.323(8)     | 147.9        |                         |
| N4-H4D...O6        | 2.12         | 3.009(9)     | 168.2        | [x, y, z-1]             |
| N5-H5A...O4        | 2.28         | 3.135(8)     | 158.0        |                         |
| N5-H5B...O12       | 2.07         | 2.945(8)     | 162.7        | [x+1, y, z]             |

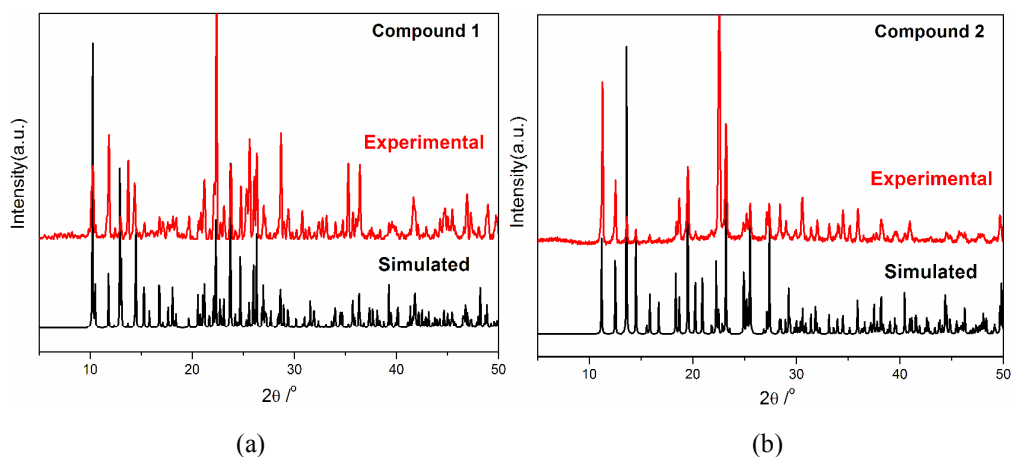

**Figure S1.** Experimental and simulated PXRD patterns of compounds **1** (a) and **2** (b).

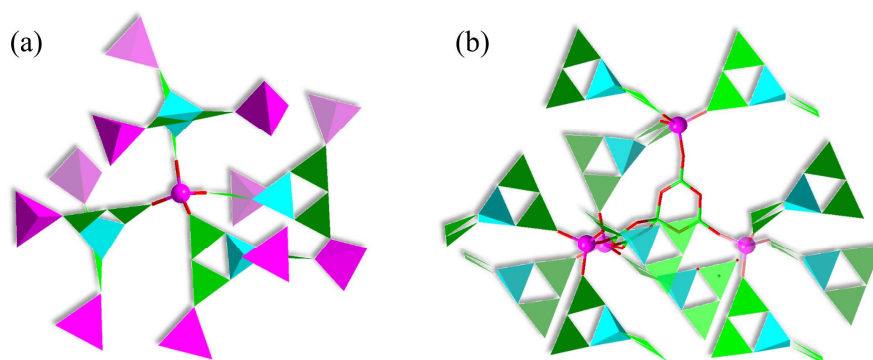

**Figure S2.** Views of the linkage of  $\text{AlO}_4$  (a) and  $\text{B}_5$  groups (b) in **1**. Each  $\text{AlO}_4/\text{B}_5$  unit is bridged by four  $\text{B}_5/\text{AlO}_4$  groups to 11 other  $\text{AlO}_4/\text{B}_5$  units.

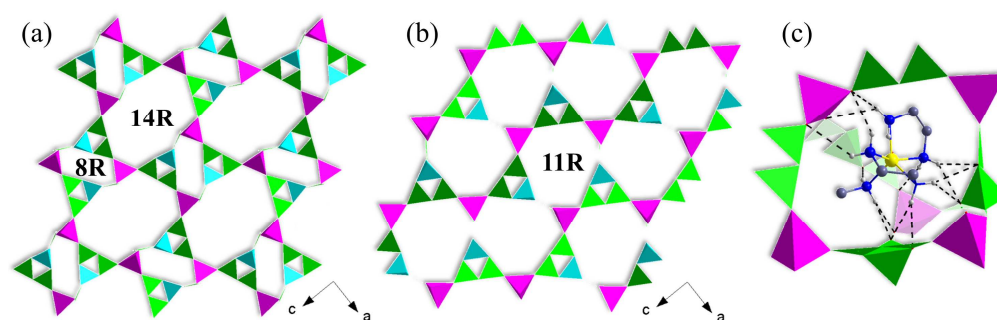

**Figure S3.** (a) View of the layer with 8-/14-MR along the  $[010]$  direction. (b) View of the layer with 11-MR along the  $[010]$  direction. (c) View of the  $[\text{Zn}(\text{ma})(\text{en})_2]^{2+}$  cations, interacting with the inorganic framework through H-bonds.

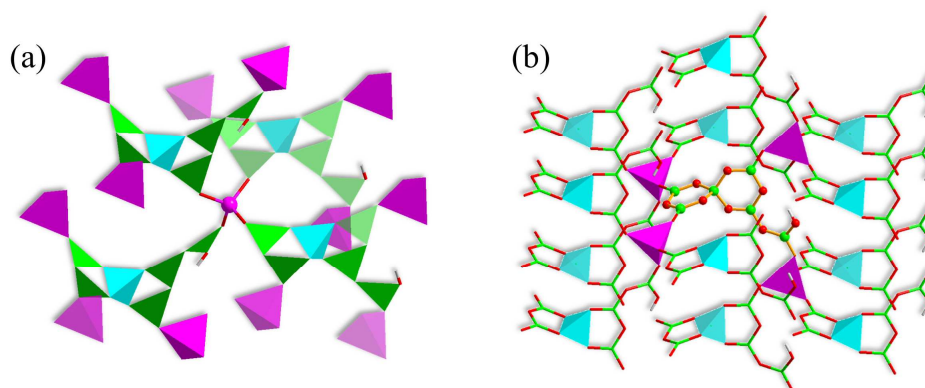

**Figure S4.** Views of the linkage of  $\text{AlO}_4$  (a) and  $\text{B}_6$  groups (b) in **2**. Each  $\text{AlO}_4/\text{B}_6$  unit is bridged by four  $\text{B}_6/\text{AlO}_4$  groups to 12 others.

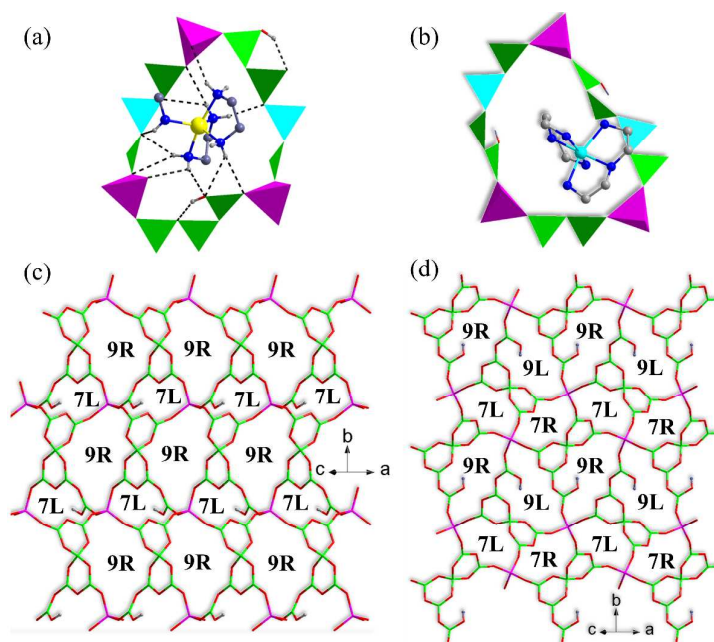

**Figure S5.** (a) View of the  $[\text{Zn}(\text{ma})(\text{en})_2]^{2+}$  cations and 13-ring channels delimited by  $-\text{AlO}_4-3\text{BO}_3-\text{AlO}_4-4\text{BO}_{3/4}-\text{AlO}_4-3\text{BO}_{3/4}-$  linkage with free diameter of about  $8.2 \times 11.7 \text{ \AA}^2$  in **2**. (b) View of the  $[\text{Zn}(\text{dien})_2]^{2+}$  cations and 13-ring opening, which is constructed by  $-\text{AlO}_4-2\text{BO}_3-\text{AlO}_4-4\text{BO}_{3/4}-\text{AlO}_4-4\text{BO}_{3/4}-$  linkage with diameter of about  $8.7 \times 10.3 \text{ \AA}^2$  in **2a**. (c) View of the 3-D framework showing 7L and 9R helical channels along the  $[101]$  direction in **2**. (d) View of the 3-D framework showing two pairs of 7L/7R and 9L/9R helical channels along the  $[101]$  direction in **2a**.

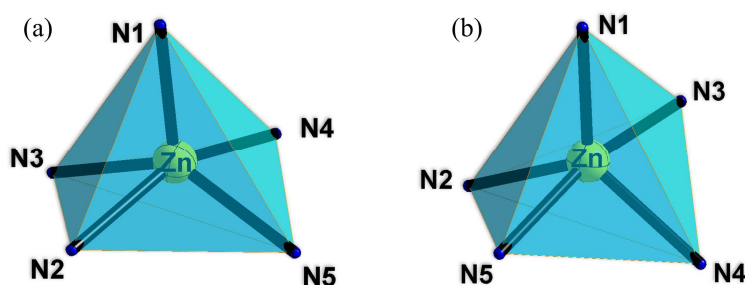

**Figure S6.** The coordination environments of Zn atoms in compounds **1** (a) and **2** (b).

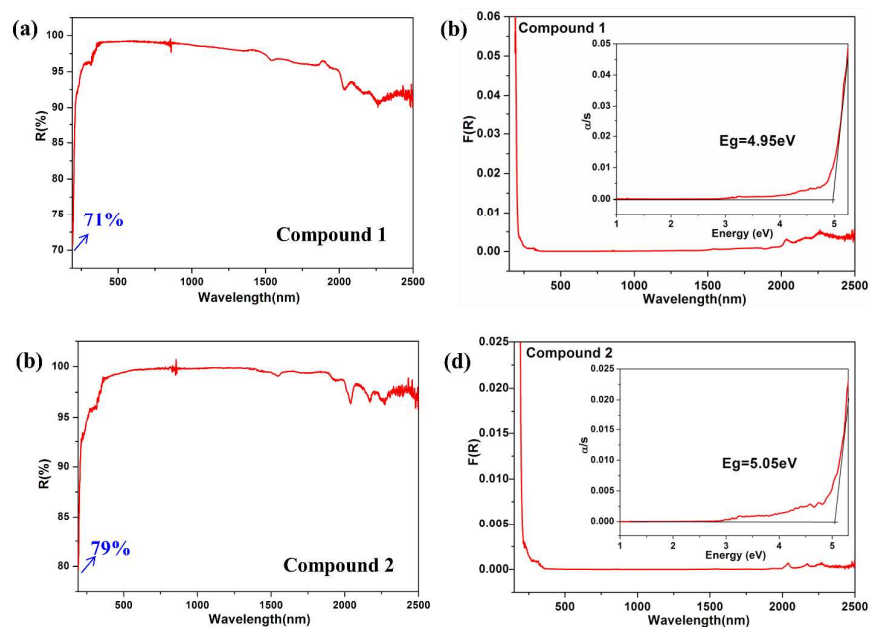

**Figure S7.** UV-vis-NIR optical diffuse reflectance spectra of compounds **1** (a,c) and **2** (b,d).

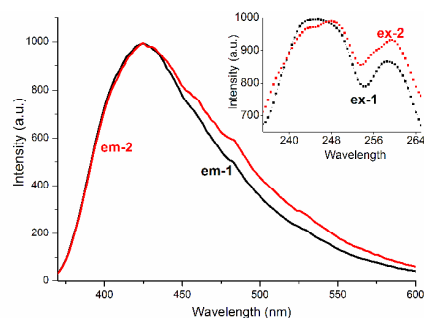

**Figure S8.** The emission and excitation (inserted graph) spectra of compounds **1** (black) and **2** (red).

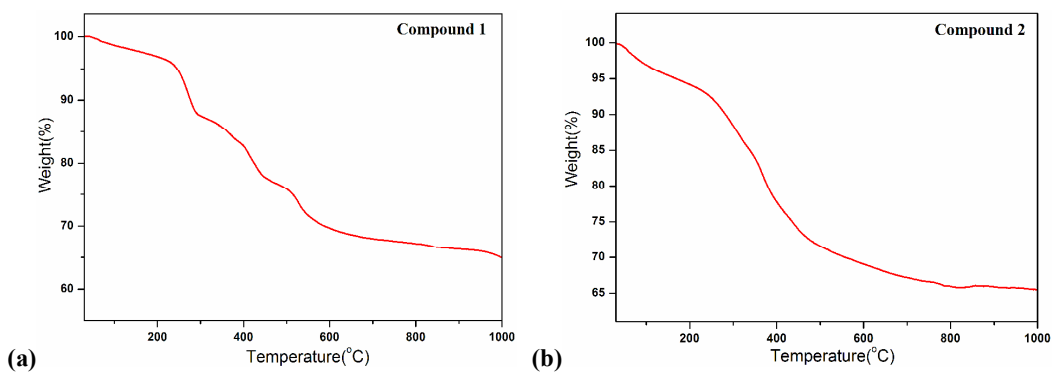

**Figure S9.** TG curves of compounds **1** (a) and **2** (b).

The thermal behaviors of **1** and **2** are shown in Figure S9. For **1**, the total weight loss from 30 to 700 °C corresponds to the removal of one ma and two en molecules. The observed loss of 33.15% matches well with the theoretical value (33.00%). **1** and **2** show similar thermal behavior. The TG curve of **2** shows a gradual weight loss of 32.40% up to 700°C, which is attributed to the gradual decomposition of organic amines and hydroxyl group, corresponding to the calculated value (31.92%).

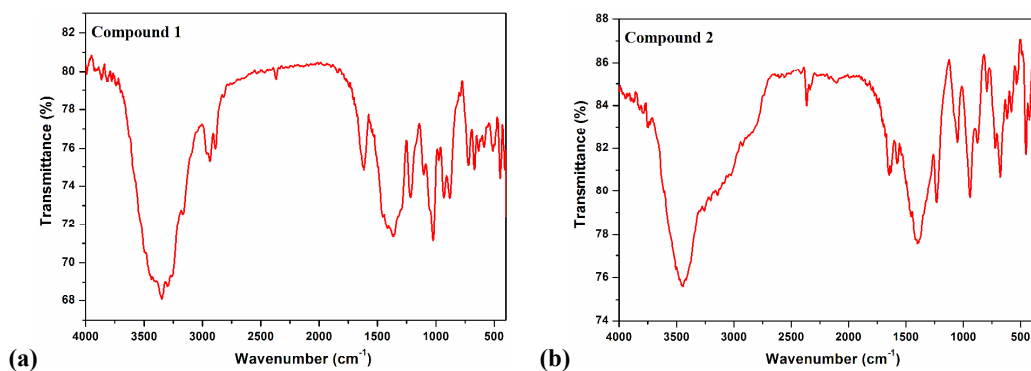

**Figure S10.** IR spectra of compounds **1** (a) and **2** (b).

The IR spectra of **1** and **2** are nearly identical and both exhibit a series of strong absorption bands. The broad absorption band around  $3450\text{--}3340\text{ cm}^{-1}$  is related to the stretching vibrations of O–H, N–H and C–H bonds. The band at  $1650\text{--}1606\text{ cm}^{-1}$  is assigned to N–H and C–H bending mode. The intense bands at  $1440\text{--}1210$  and  $1150\text{--}1010\text{ cm}^{-1}$  can be assigned to the B–O asymmetrical stretch of the  $\text{BO}_3$  and  $\text{BO}_4$  groups, respectively. While the band around  $975\text{--}880\text{ cm}^{-1}$  is associated with the symmetric stretching vibrations of  $\text{BO}_3$  and  $\text{BO}_4$  units. In addition, the bending vibrations of the two units are observed in the range of  $720\text{--}630\text{ cm}^{-1}$ .<sup>1</sup> The bands around  $510$  and  $445\text{ cm}^{-1}$  are due to the stretching-bending vibrations of  $\text{AlO}_4$  units.<sup>2</sup> The results are consistent with those of the structural analyses.

(1) (a) Xu, X.; Hu, C. L.; Kong, F.; Zhang, J. H.; Mao, J. G.; Sun, J.  $\text{Cs}_2\text{GeB}_4\text{O}_9$ : a New Second-Order Nonlinear-Optical Crystal. *Inorg. Chem.* **2013**, *52*, 5831–5837. (b) Cheng, L.; Yang, G. Y. A novel aluminoborate open-framework  $[\text{In}(\text{dien})_2][\text{Al}_2\text{B}_7\text{O}_{16}\text{H}_2]$  with large chiral cavities templated by chiral main group metal complexes. *Chem. Commun.* **2014**, *50*, 344–346.

(2) Yu, H.; Pan, S.; Wu, H.; Yang, Z.; Dong, L.; Su, X.; Zhang, B.; Li, H. Effect of Rigid Units on the Symmetry of the Framework: Design and Synthesis of Centrosymmetric  $\text{NaBa}_4(\text{B}_5\text{O}_9)_2\text{F}_2\text{Cl}$  and Noncentrosymmetric  $\text{NaBa}_4(\text{AlB}_4\text{O}_9)_2\text{Br}_3$ . *Cryst. Growth Des.* **2013**, *13*, 3514–3521.
